# Supplementary material for: Plasma Homocysteine Concentration is Associated with the Expression Level of Folate Receptor 3
Source: PubMed Central journal article supplement (PMC7314855; doi:10.1038/s41598-020-67288-9), 2020-06-24
Supplement: 41598_2020_67288_MOESM1_ESM.pdf [file 41598_2020_67288_MOESM1_ESM.pdf]

## **Plasma Homocysteine Concentration is Associated with the Expression Level of Folate Receptor 3**

**Ren Yoshitomi<sup>1</sup>, Kai Nakayama<sup>1</sup>, Shuya Yamashita<sup>1,2</sup>, Motofumi Kumazoe<sup>1</sup>, Ting-An Lin<sup>1</sup>, Chen-Yi Mei<sup>1</sup>, Yuki Marugame<sup>1</sup>, Yoshinori Fujimura<sup>1</sup>, Mari Maeda-Yamamoto<sup>3</sup>, Shinichi Kuriyama<sup>4</sup> and Hirofumi Tachibana<sup>1,\*</sup>**

<sup>1</sup>Division of Applied Biological Chemistry, Department of Bioscience and Biotechnology, Faculty of Agriculture, Kyushu University, Fukuoka, Japan. <sup>2</sup> Institute of Fruit Tree and Tea Science, National Agriculture and Food Research Organization, Makurazaki, Japan. <sup>3</sup>Food Research Institute, National Agriculture and Food Research Organization, Ibaraki, Japan. <sup>4</sup>Division of Molecular Epidemiology, Tohoku University Graduate School of Medicine, Sendai, Japan \*email: [tatibana@agr.kyushu-u.ac.jp](mailto:tatibana@agr.kyushu-u.ac.jp)

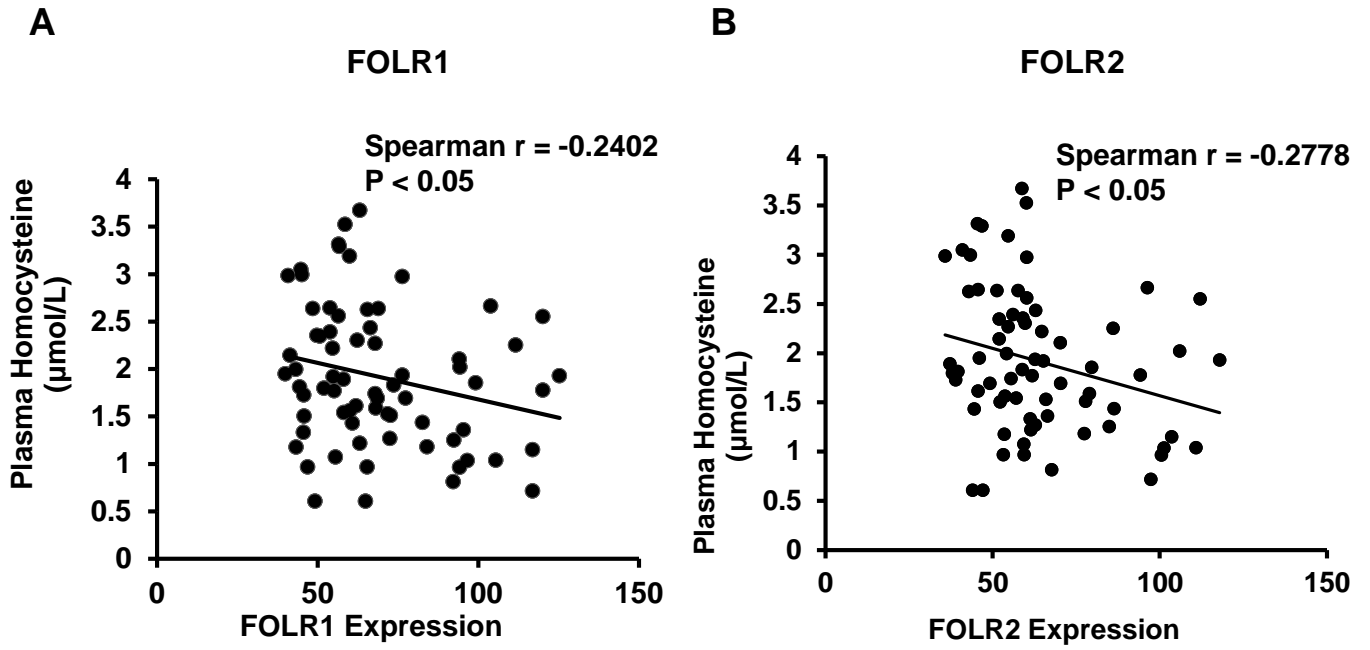

**Supplementary figure 1. The correlation between plasma Hcy and FOLR1 or plasma Hcy and FOLR2.** A),B) Spearman rank correlation analysis between plasma homocysteine and FOLR1 signal intensity (A) or FOLR2 signal intensity (B).

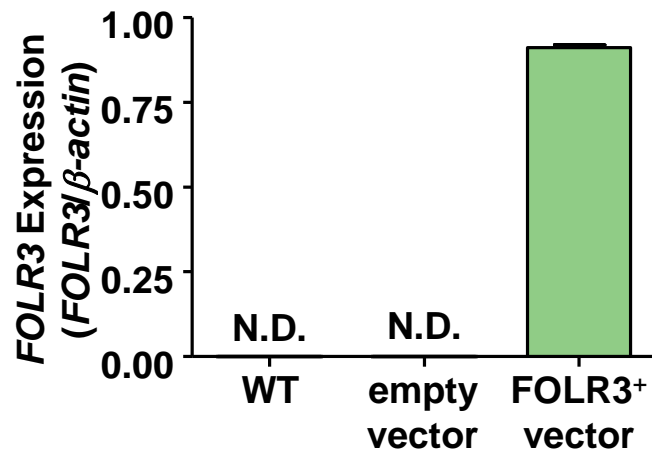

Supplementary figure 2. FOLR3 overexpression in HEK293.  
data presented mean  $\pm$  S.E. (n = 3) N.D.; not detected

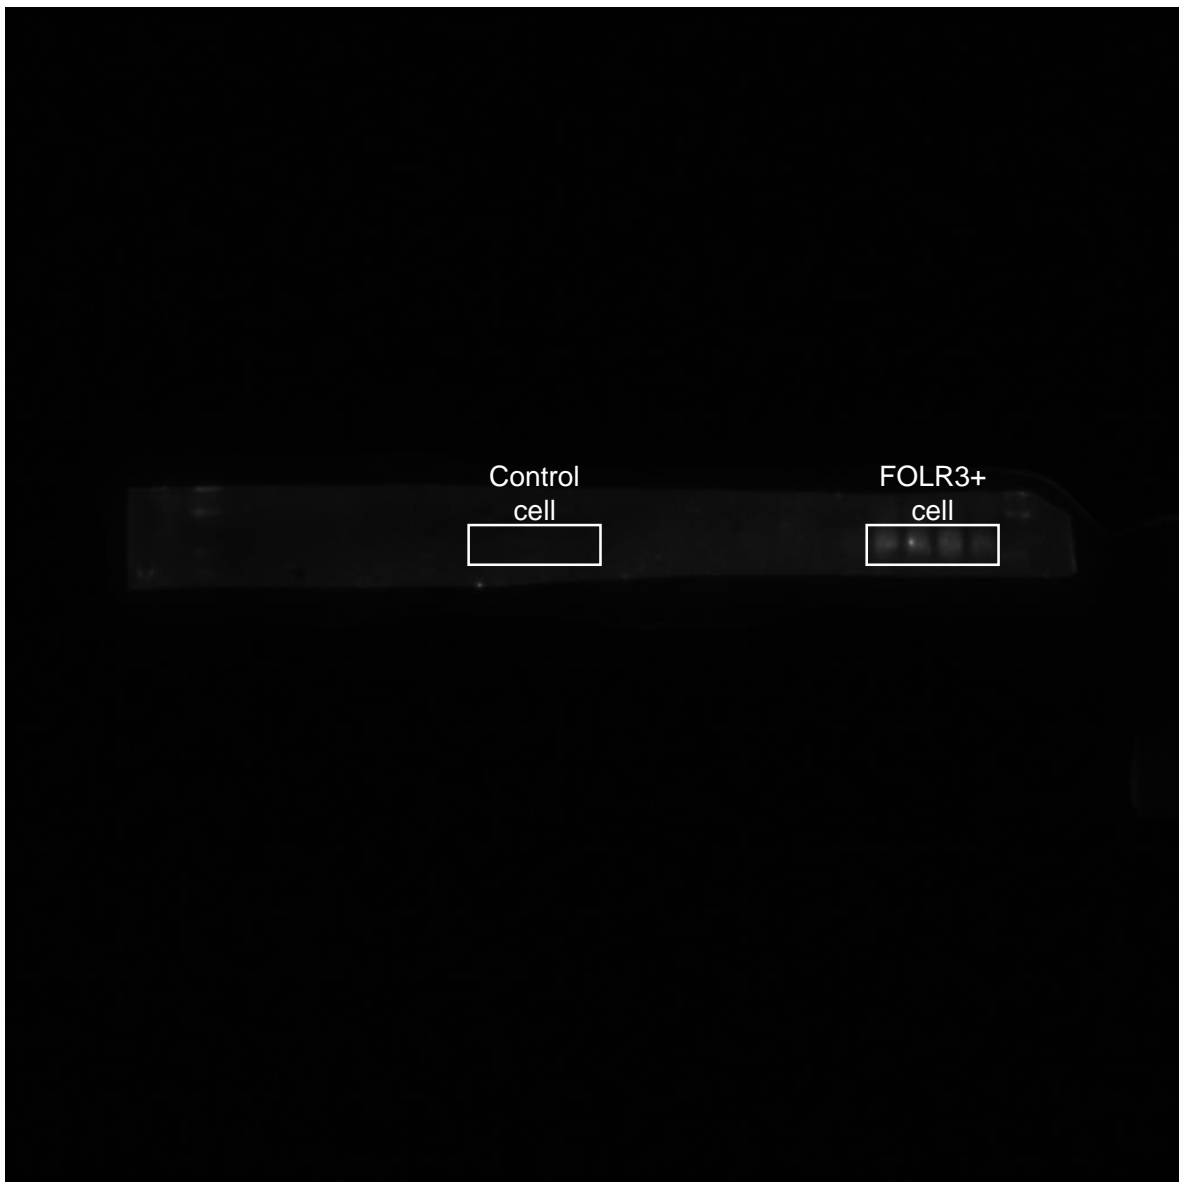

Supplementary figure 3. The raw data of figure 5A
